# Supplementary material
Source: MDPI journal article supplement (https://www.mdpi.com/2073-4441/14/23/3950)
Supplement: s1 [file s1 › water-1918528-supplementary.pdf]

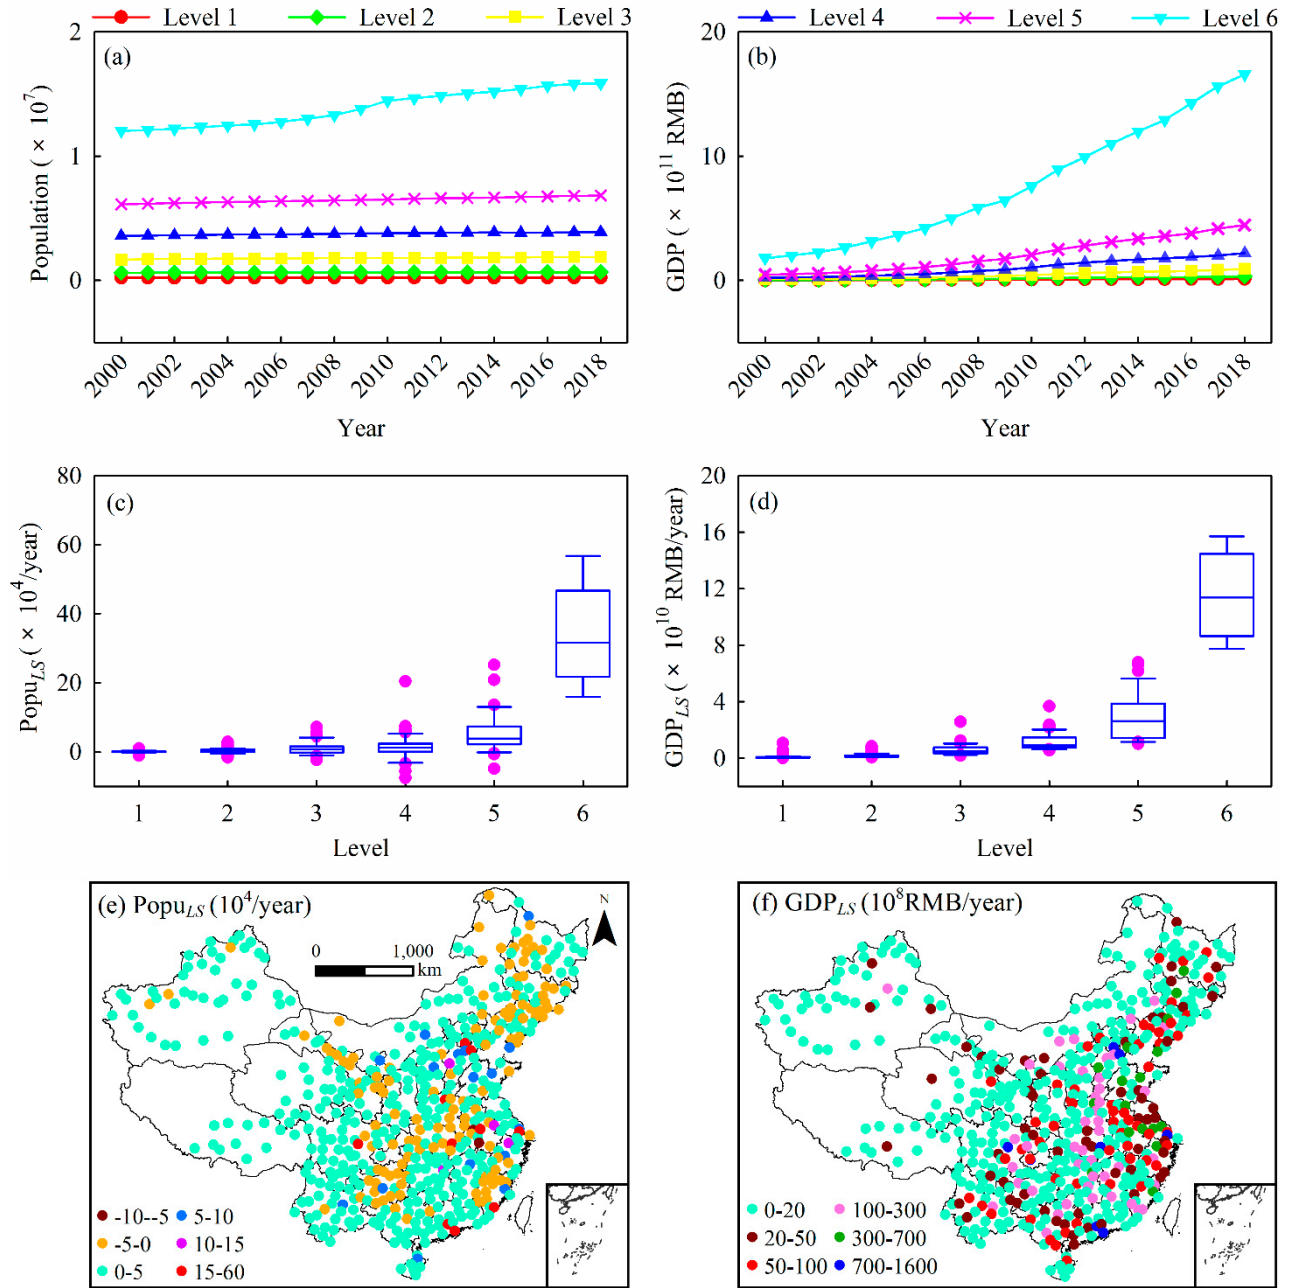

**Figure S1.** The temporal fluctuations of population and GDP over 2000-2018, their linear slopes (LS) variations with different site-scales, and the spatial distribution of PopuLS and GDPLS in mainland China.

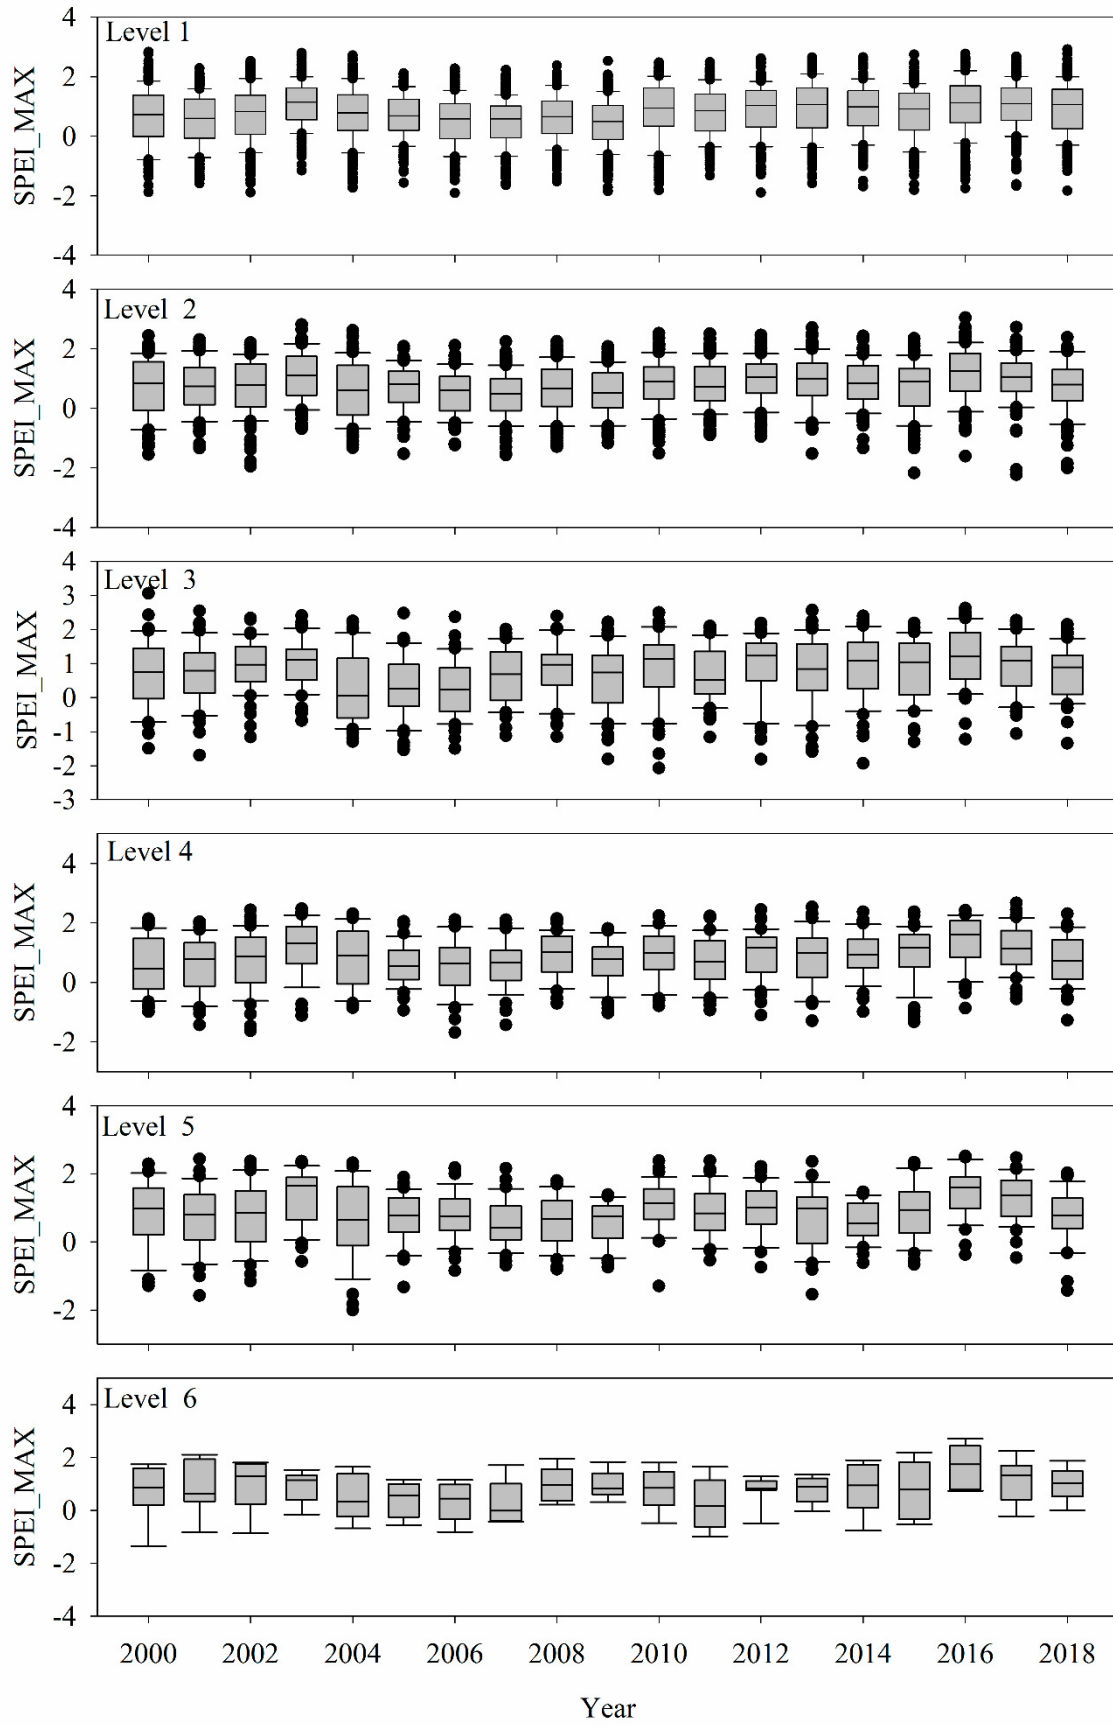

**Figure S2.** The boxplot of SPEI\_MAX variations for the sites belonging to the six site-scales over 2000-2018.

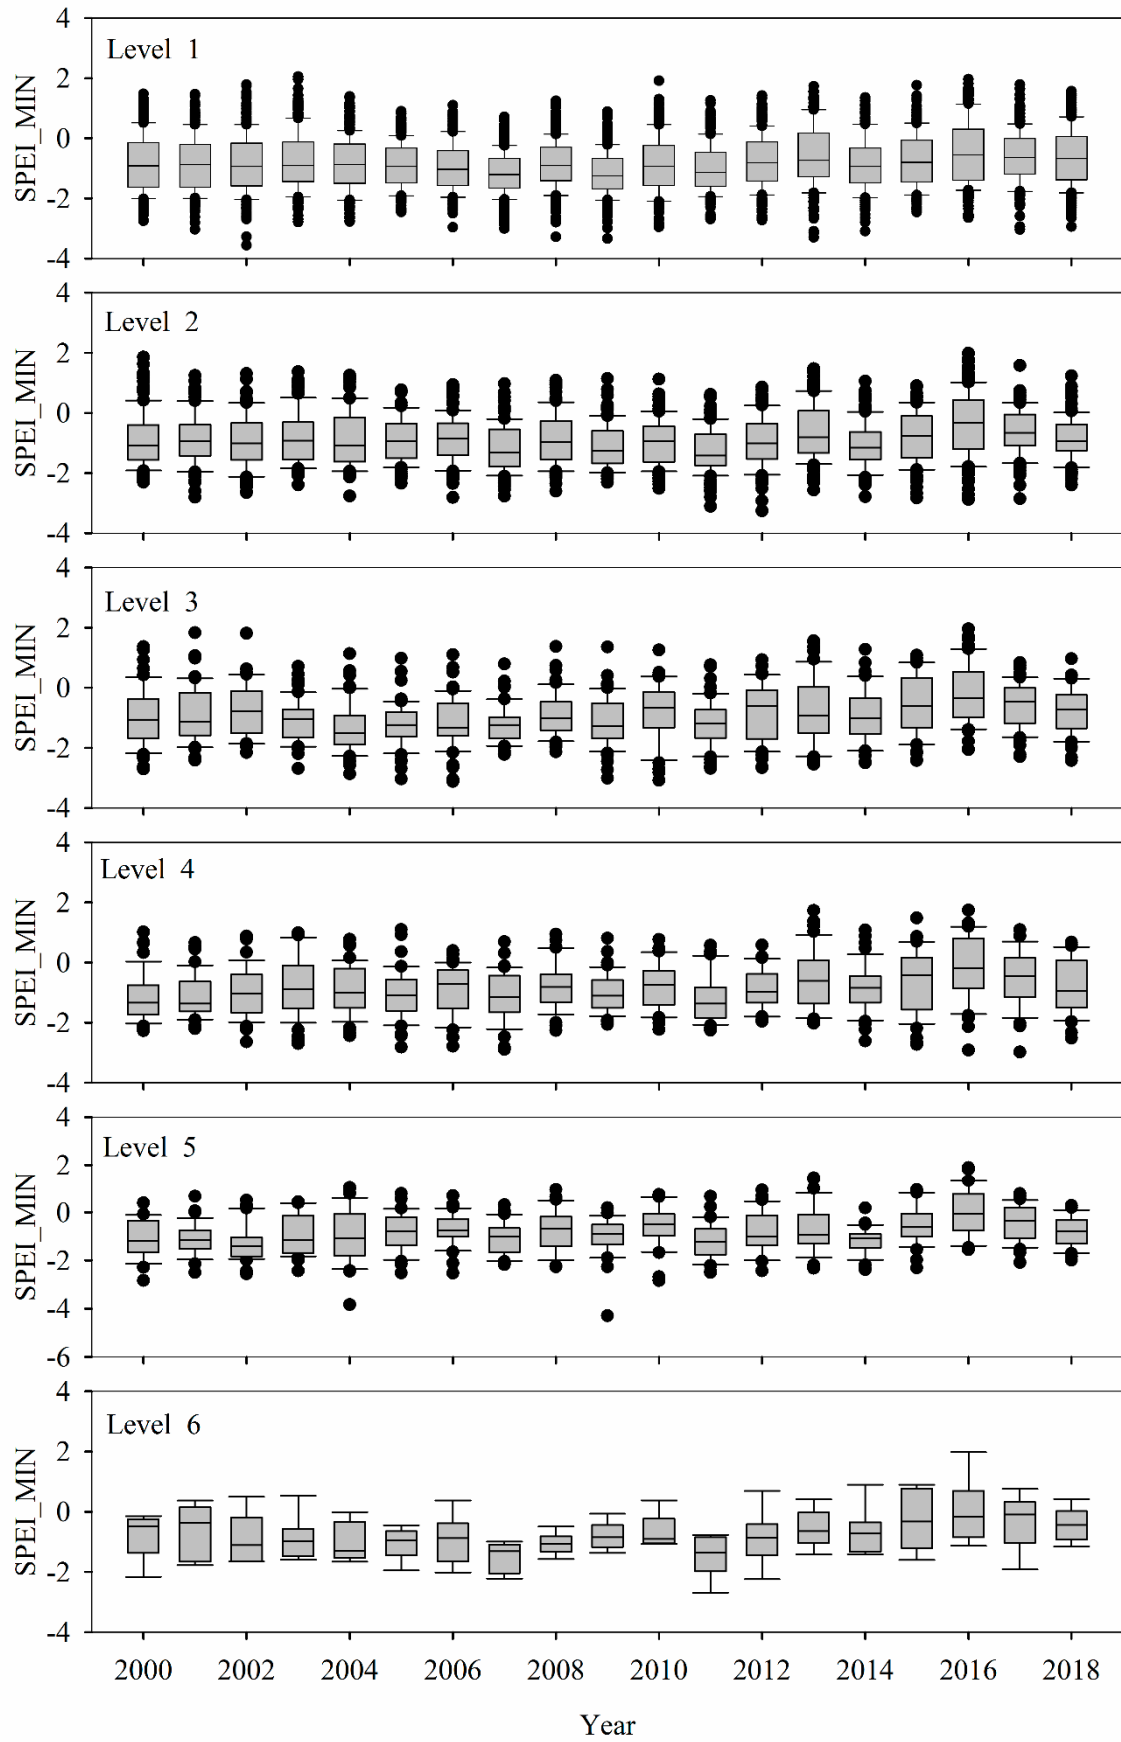

**Figure S3.** The boxplot of SPEI\_MIN variations for the sites belonging to six site-scales over 2000-2018.
